# Supplementary material
Source: PubMed Central journal article supplement (PMC1914194)
Supplement: plntphys_pp.107.097477_2.pdf [file plntphys_pp.107.097477_2.pdf]

## **Supplemental Data**

**Supplemental Figure 1.** Microscopy analysis of tomato fruit pericarp cell separation. Light microscopy images of AC (A) and DFD (B) red ripe (RR) fruit pericarp. TEM analysis of AC (C) and DFD (D) RR fruit, highlighting intercellular separation, the cell junction (CJ) and the cuticular layer (CL). Scale bars for A and B = 20  $\mu\text{m}$  and for C and D = 0.7 $\mu\text{m}$ .

**Supplemental Material (Video) Legend.** A time lapse video spanning 4 months showing 2 AC fruits (left and right) and 1 DFD fruit (middle) during storage at ambient temperature and humidity.
