# Supplementary material
Source: PubMed Central journal article supplement (PMC1914194)

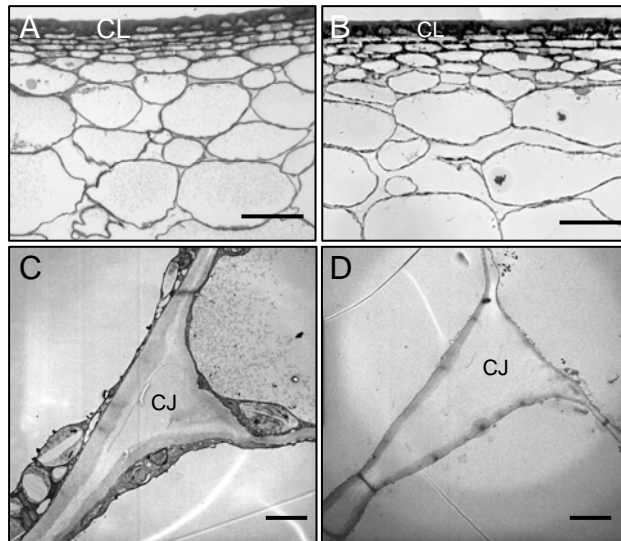

Supplement: plntphys_pp.107.097477_1.pdf [file plntphys_pp.107.097477_1.pdf]
